# Supplementary material for: Limitations of PLX3397 as a microglial investigational tool: peripheral and off-target effects dictate the response to inflammation
Source: Front Immunol. 2023 Nov 22;14:1283711. doi: 10.3389/fimmu.2023.1283711 (PMC10703484; doi:10.3389/fimmu.2023.1283711)
Supplement: Supplementary Table 9 — ANOVA table of relative amounts bone marrow immune cells LPS injected mice pretreated with different doses PLX3397 chow, compared to PBS controls [file Table_9.xlsx]

## Sheet: Supplementary table 1
Antibody	Fluorophore	Dilution	Company	Reference number
ACSA2	PE	1/140	Miltenyi Biotec	130-123-284
CD11b	PE-Cy7	1/300	BD Biosciences	552850
CD11b	BUV395	1/200	BD Biosciences	563553
CD11c	FITC	1/100	BD Pharmingen	553801
CD19	BV605	1/200	BioLegend	115540
CD3	PE-Cy5	1/200	eBioscience	15-0031-82
CD4	PerCP-Cy5.5	1/200	BioLegend	100434
CD45	BV605	1/500	BD Biosciences	563053
CD45	BUV805	1/800	BD Biosciences	748370
CD45	PE	1/400	BioLegend	103106
CD64	BV711	1/100	BioLegend	139311
CD8	BUV615	1/200	BD Biosciences	613004
F4/80	BV785	1/100	BioLegend	123141
Fixable Viability Dye	eFluor 506	1/1000	eBioscience	65-0866-14
Ly6C	eFluor450	1/400	eBioscience	48-5932-82
Ly6G	Alexa Fluor 700	1/400	BD Pharmingen	561236
MHCII	APC-eFluor780	1/800	eBioscience	47-5321-82
NK1.1	BUV805	1/200	BD Biosciences	741926
O1	eFluor660	1/810	eBioscience	50-6506-82
Ter119	BV785	1/400	BioLegend	116245
